# Supplementary material for: A systematic review and meta-analysis of geographic differences in comorbidities and associated severity and mortality among individuals with COVID-19
Source: PubMed Central journal article supplement (PMC8058064; doi:10.1038/s41598-021-88130-w), 2021-04-20
Supplement: 41598_2021_88130_MOESM1_ESM.pdf [file 41598_2021_88130_MOESM1_ESM.pdf]

**A systematic review and meta-analysis of geographic differences in comorbidities and associated severity and mortality among individuals with COVID-19**

Bhaskar Thakur<sup>1</sup>, Pallavi Dubey<sup>2</sup>, Joseph Benitez<sup>3</sup>, Joshua P. Torres<sup>3</sup>, Sireesha Reddy<sup>2</sup>, Navkiran Shokar<sup>4</sup>, Koko Aung<sup>5</sup>, Debabrata Mukherjee<sup>5</sup>, Alok K. Dwivedi<sup>1,3,6</sup>.

<sup>1</sup>Division of Biostatistics and Epidemiology, Department of Molecular and Translational Medicine, Paul L. Foster School of Medicine, Texas Tech University Health Sciences Center El Paso, 5001 El Paso Drive, TX, 79905, USA.

<sup>2</sup>Department of Obstetrics & Gynecology, Paul L. Foster School of Medicine, Texas Tech University Health Sciences Center El Paso, 4800 Alberta Avenue, El Paso, TX, 79905, USA.

<sup>3</sup>Graduate School of Biomedical Sciences, Texas Tech University Health Sciences Center El Paso, 5001 El Paso Drive, TX, 79905, USA.

<sup>4</sup>Department of Family and Community Medicine, Paul L. Foster School of Medicine, Texas Tech University Health Sciences Center El Paso, 9849 Kenworthy St., TX, 79924, USA.

<sup>5</sup> Department of Internal Medicine, Texas Tech University Health Science Center El Paso, Paul L. Foster School of Medicine, 4800 Alberta Ave, El Paso, Texas, 79905, USA.

<sup>6</sup> Biostatistics and Epidemiological Consulting Lab, Texas Tech University Health Sciences Center El Paso, 5001 El Paso Drive, TX, 79905, USA.

Corresponding Author:

Alok Kumar Dwivedi, Department of Molecular and Translational Medicine, Paul L. Foster School of Medicine, Texas Tech University Health Sciences Center El Paso, Medical Science Building, 5001 El Paso Drive, El Paso Texas 79905, USA

Email: [alok.dwivedi@ttuhsc.edu](mailto:alok.dwivedi@ttuhsc.edu)

Tel: 9152154177

### **Comorbidities**

We collected status of the comorbidities (number of subjects without any comorbidity, number of subjects with one comorbidity, number of subjects with multiple comorbidities), the type of comorbidity that included hypertension (HTN), diabetes mellitus (DM), cardiovascular disease (CVD), obesity (OB), cerebrovascular accident (CVA), lung disease, cancer/malignancy, either of chronic or acute kidney disease (CKD) and liver related disease.

In our study, the HTN includes isolated hypertension, pulmonary hypertension, and high blood pressure. The CVD includes heart failure, atrial fibrillation, coronary heart disease, congestive heart failure, cardiac insufficiency, subvalvular aortic stenosis, myocardial infarction and other ischemic heart diseases. Cerebrovascular disease includes a history of all types of strokes and cerebrovascular accident. Chronic lung diseases involves chronic lung disease , asthma, chronic obstructive pulmonary disease , chronic respiratory disease, small airway obstruction syndrome, chronic lower respiratory disease, environmental lung disease, interstitial lung disease, chronic respiratory failure, diaphragm palsy, pulmonary vascular disease, tuberculosis, bronchitis, emphysema, and other chronic lung diseases. Cancer/malignancy contains solid malignant tumors, hematological malignant disease, and any other form of cancers or malignancies. CKD/ other renal disease consists of acute kidney injury, chronic kidney disease, end stage renal disease, and other renal diseases.

### **Primary outcomes**

The primary outcomes in this study were COVID-19 severity and mortality. Any COVID-19 patients who had one of the following criteria: (a) admitted to the intensive care unit (ICU), (b) required mechanical ventilation support, (c) required mechanical shock/life support, (d) developed sepsis or septic shock, or (e) poor prognosis or labeled as critically ill by the attending physicians, were classified as severe COVID-19. Any study who reported death as the outcome for COVID-19 patients regardless of any underlying comorbidities was considered as mortality event due to COVID-19.

### **Comparing variables**

The primary variables of interest for comparing outcomes were geographic location, age groups, and gender. The geographic location was grouped into Asia (China, India, Iran, Oman, South Korea), Europe (Denmark, France, Germany, Italy, Netherlands, Poland, Spain, Switzerland, Turkey, UK, and Italy), Latin America (Brazil and Mexico), South Africa, and USA. Based on the distribution of average age, the age was categorized into  $\leq 50$  years, 51 – 65 years, and  $> 65$  years. Similarly, the percentage of the female population was divided into two groups as  $\leq 50\%$ : male dominant and  $> 50\%$ : female dominant.

### **Quality Assessment**

Only seven out of the first eight items (criteria to assess the non-randomized and non-comparative studies) of MINORS were used in this study. Item number five (unbiased assessment of the study endpoint) was not used as the study endpoints were straight forward and the blind evaluation was not needed. Since the majority of the included studies were cross-sectional conducted on hospitalization of COVID-19 patients, we did not report any loss to follow up. A score from 0 to 2 was given for all the seven items according to whether the item related attributes were reported or not as well as adequate or not [0 (unreported), 1 (reported but inadequate) or 2 (reported and adequate)]. The total score assigned to each study was categorized for the quality assessment which follows: 0–2, very low quality; 3–6, low quality; 7–10, fair quality; and 11–14, high quality. In addition, we also evaluated publication bias for the primary outcomes within each comorbidity using Egger's test.

Supplementary Table 1

Characteristics and quality assessment score of included studies

| Study                         | Country | No. of patients | No. of Female (%) | Age, mean $\pm$ SD /median (IQR) | Comorbidity | Multiple morbidities | Severity | Mortality | Hospitalization status | Quality assessment |
|-------------------------------|---------|-----------------|-------------------|----------------------------------|-------------|----------------------|----------|-----------|------------------------|--------------------|
| Wang, L et al. <sup>1</sup>   | China   | 339             | 173 (51)          | 71 $\pm$ 8                       | 206         | NA                   | NA       | NA        | Hospitalized           | 12                 |
| Cao, J et al. <sup>2</sup>    | China   | 102             | 49 (48)           | 54 (37, 67)                      | 47          | NA                   | NA       | 17        | Hospitalized           | 13                 |
| Chen, T et al. <sup>3</sup>   | China   | 274             | 103 (37.6)        | 62 (44, 70)                      | 133         | NA                   | NA       | 113       | Hospitalized           | 12                 |
| Deng, Y et al. <sup>4</sup>   | China   | 225             | 101 (44.9)        | 69 (62, 74)                      | 127         | NA                   | NA       | 109       | Hospitalized           | 12                 |
| Yuan, M et al. <sup>5</sup>   | China   | 27              | 15 (55.6)         | 60 (47, 69)                      | 13          | NA                   | NA       | 10        | Hospitalized           | 10                 |
| Wu, C et al. <sup>6</sup>     | China   | 201             | 73 (36.3)         | 51 (43, 60)                      | 66          | NA                   | NA       | NA        | Hospitalized           | 12                 |
| Li, K et al. <sup>7</sup>     | China   | 83              | 39 (47)           | 45.5 $\pm$ 12.3                  | 15          | NA                   | 25       | NA        | Hospitalized           | 12                 |
| Yang, X et al. <sup>8</sup>   | China   | 52              | 17 (32.7)         | 59.7 $\pm$ 13.3                  | 21          | NA                   | NA       | 32        | Hospitalized           | 11                 |
| Zhang, JJ et al. <sup>9</sup> | China   | 140             | 69 (49.3)         | 57 (25, 87)                      | 90          | NA                   | 58       | NA        | Hospitalized           | 13                 |
| Wang, D et al. <sup>10</sup>  | China   | 138             | 63 (45.7)         | 56 (42, 68)                      | 64          | NA                   | 36       | NA        | Hospitalized           | 13                 |
| Huang, C et al. <sup>11</sup> | China   | 41              | 11 (26.8)         | 49 (41, 58)                      | 13          | NA                   | 13       | NA        | Hospitalized           | 12                 |
| Wang, Z et al. <sup>12</sup>  | China   | 69              | 37 (53.6)         | 42 (35, 62)                      | 25          | NA                   | NA       | NA        | Hospitalized           | 12                 |
| Guan, WJ et al. <sup>13</sup> | China   | 1590            | 686 (43.1)        | 48.9 $\pm$ 16.3                  | 399         | 52                   | 254      | 50        | Hospitalized           | 13                 |
| Chen, T et al. <sup>14</sup>  | China   | 55              | 21 (38.2)         | 74 (65, 91)                      | 35          | NA                   | NA       | 19        | Hospitalized           | 11                 |

|                                       |        |      |             |             |      |    |    |     |              |    |
|---------------------------------------|--------|------|-------------|-------------|------|----|----|-----|--------------|----|
| Chen, Q et al. <sup>15</sup>          | China  | 145  | 66 (45.5)   | 47.5 ± 14.6 | 75   | NA | 43 | NA  | Hospitalized | 12 |
| Zhang, G et al. <sup>16</sup>         | China  | 221  | 113 (51.1)  | 55 (39, 67) | 78   | NA | 55 | NA  | Hospitalized | 12 |
| Zhang, R et al. <sup>17</sup>         | China  | 120  | 77 (64.2)   | 45.4 ± 15.6 | 32   | NA | 30 | NA  | Hospitalized | 12 |
| Nikpouraghdam, M et al. <sup>18</sup> | Iran   | 2964 | 1009 (34)   | 56 (46, 65) | 323  | NA | NA | 239 | Hospitalized | 9  |
| Li, Y et al. <sup>19</sup>            | China  | 54   | 20 (37)     | 61.8 ± 14.5 | 30   | NA | 54 | NA  | Hospitalized | 11 |
| Zhou, F et al. <sup>20</sup>          | China  | 191  | 73 (38.2)   | 56 (46, 67) | 91   | NA | NA | 54  | Hospitalized | 12 |
| He, R et al. <sup>21</sup>            | China  | 204  | 125 (61.3)  | 49 (34, 62) | 57   | NA | NA | NA  | Hospitalized | 12 |
| Yang, AP et al. <sup>22</sup>         | China  | 93   | 37 (39.8)   | 46.4 ± 17.6 | 50   | NA | 24 | NA  | Hospitalized | 11 |
| Borobia, AM et al. <sup>23</sup>      | Spain  | 2226 | 1152 (51.8) | 61 (46, 78) | 1747 | NA | NA | 460 | Hospitalized | 13 |
| Zhang, C et al. <sup>24</sup>         | China  | 80   | 47 (58.8)   | 51.2 ± 17.5 | 56   | NA | NA | NA  | Hospitalized | 11 |
| Zhao, J et al. <sup>25</sup>          | China  | 29   | 15 (51.7)   | 56 (32, 66) | 19   | 8  | 21 | 1   | Hospitalized | 11 |
| Yao, Q et al. <sup>26</sup>           | China  | 108  | 65 (60.2)   | 52 (37, 58) | 25   | NA | 25 | 12  | Hospitalized | 13 |
| Kayem, G et al. <sup>27</sup>         | France | 617  | 100 (100)   | NA          | NA   | NA | NA | NA  | Hospitalized | 9  |
| Tambe, MP et al. <sup>28</sup>        | India  | 197  | 107 (54.3)  | 45.8 ± 17.3 | 93   | NA | NA | 58  | Hospitalized | 13 |
| Yang, Q et al. <sup>29</sup>          | China  | 136  | 70 (51.5)   | 56 (44, 64) | NA   | NA | NA | NA  | Hospitalized | 12 |
| Şenkal, N et al. <sup>30</sup>        | Turkey | 611  | 248 (40.6)  | 57 ± 15     | NA   | NA | NA | NA  | Hospitalized | 13 |
| Shi, S et al. <sup>31</sup>           | China  | 416  | 211 (50.7)  | 64 (21, 95) | NA   | NA | NA | NA  | Hospitalized | 12 |
| Mani, VR et al. <sup>32</sup>         | USA    | 184  | 73 (39.7)   | 64.7 ± 14.9 | NA   | NA | NA | NA  | Hospitalized | 12 |
| Li, M et al. <sup>33</sup>            | China  | 83   | 49 (59)     | 43 (32, 62) | 42   | NA | 18 | 6   | Hospitalized | 11 |
| Salacup, G et al. <sup>34</sup>       | USA    | 242  | 119 (49.2)  | 66 (58, 76) | NA   | NA | NA | NA  | Hospitalized | 12 |

|                                                |             |      |             |             |     |    |     |    |              |    |
|------------------------------------------------|-------------|------|-------------|-------------|-----|----|-----|----|--------------|----|
| Shi, S et al. <sup>35</sup>                    | China       | 671  | 322 (48)    | 63 (50, 72) | NA  | NA | NA  | NA | Hospitalized | 13 |
| Kalyanaraman Marcello, R. et al. <sup>36</sup> | USA         | 6248 | 2396 (38.3) | 61 (50, 73) | NA  | NA | NA  | NA | Hospitalized | 13 |
| Israelsen, SB et al. <sup>37</sup>             | Denmark     | 175  | 90 (51.4)   | 71 (55, 81) | 125 | NA | NA  | NA | Hospitalized | 12 |
| Pellaud, C et al. <sup>38</sup>                | Switzerland | 196  | 77 (39.3)   | 70 (60, 80) | 162 | NA | 49  | NA | Hospitalized | 12 |
| Gregoriano, C et al. <sup>39</sup>             | Switzerland | 99   | 37 (37.4)   | 67 (56, 76) | NA  | NA | NA  | NA | Hospitalized | 11 |
| Argenziano, MG et al. <sup>40</sup>            | USA         | 1000 | 65 (6.5)    | 55 (40, 69) | 918 | NA | 386 | NA | Hospitalized | 13 |
| Borghesi, A et al. <sup>41</sup>               | Italy       | 302  | 108 (35.8)  | 67 (57, 77) | NA  | NA | NA  | NA | Hospitalized | 12 |
| Toussie, D et al. <sup>42</sup>                | USA         | 338  | 128 (37.9)  | 39 (31, 45) | NA  | NA | NA  | NA | Hospitalized | 12 |
| Ortiz-Brizuela, E et al. <sup>43</sup>         | Mexico      | 140  | 55 (39.3)   | 78 (70, 88) | NA  | NA | NA  | NA | Hospitalized | 13 |
| Aggarwal, A et al. <sup>44</sup>               | India       | 32   | 13 (40.6)   | 55 (46, 60) | 22  | 11 | 24  | NA | Hospitalized | 11 |
| Javanian, M et al. <sup>45</sup>               | Iran        | 100  | 49 (49)     | 60.1 ± 13.9 | 50  | NA | NA  | NA | Hospitalized | 12 |
| Huang, Q et al. <sup>46</sup>                  | China       | 54   | 26 (48.1)   | 41 (31, 51) | 18  | NA | 3   | NA | Hospitalized | 11 |
| Pelayo, J et al. <sup>47</sup>                 | USA         | 223  | 50 (22.4)   | 65.9 ± 14.9 | NA  | NA | NA  | NA | Hospitalized | 12 |
| Alkundi, A et al. <sup>48</sup>                | UK          | 232  | 87 (37.5)   | 70.5 ± 15.7 | NA  | NA | NA  | NA | Hospitalized | 12 |
| Qin, C et al. <sup>49</sup>                    | China       | 1875 | 930 (49.6)  | 63 (51, 70) | NA  | NA | NA  | NA | Hospitalized | 13 |
| Chen, Y et al. <sup>50</sup>                   | China       | 904  | 483 (53.4)  | 56(39, 67)  | NA  | NA | NA  | NA | Hospitalized | 13 |
| Khamis, F et al. <sup>51</sup>                 | Oman        | 63   | 10 (15.9)   | 48 ± 16     | 32  | NA | NA  | NA | Hospitalized | 12 |
| Gayam, V et al. <sup>52</sup>                  | USA         | 408  | 177 (43.4)  | 67 (56, 76) | NA  | NA | NA  | NA | Hospitalized | 12 |
| Shi, Q et al. <sup>53</sup>                    | China       | 306  | 156 (51)    | 64 (56, 72) | NA  | NA | NA  | NA | Hospitalized | 12 |
| Nowak, B et al. <sup>54</sup>                  | Poland      | 169  | 82 (48.5)   | 63.7 ± 19.6 | 137 | NA | NA  | NA | Hospitalized | 12 |

|                                  |         |      |               |                |     |    |     |    |                                          |    |
|----------------------------------|---------|------|---------------|----------------|-----|----|-----|----|------------------------------------------|----|
| Rottoli, M et al. <sup>55</sup>  | Italy   | 482  | 163<br>(33·8) | 66·2 ±<br>16·8 | NA  | NA | NA  | NA | Hospitalized                             | 12 |
| Huang, Y et al. <sup>56</sup>    | China   | 1255 | 589<br>(46·9) | 64(52, 70)     | 791 | NA | 236 | NA | Hospitalized                             | 9  |
| Li, T et al. <sup>57</sup>       | China   | 312  | 125<br>(40·1) | 69·2 ± 7·3     | 241 | NA | 105 | NA | Hospitalized                             | 12 |
| Zhou, X et al. <sup>58</sup>     | China   | 110  | 50 (45·5)     | 57·7 ±<br>14·2 | NA  | NA | NA  | NA | Hospitalized                             | 12 |
| Wu, F et al. <sup>59</sup>       | China   | 1048 | 457<br>(43·6) | 63·5           | 382 | NA | NA  | NA | Hospitalized<br>and non-<br>hospitalized | 12 |
| Xu, J et al. <sup>60</sup>       | China   | 239  | 96 (40·2)     | 62·5 ±<br>13·3 | 162 | NA | NA  | NA | Hospitalized                             | 11 |
| Buckner, FS et al. <sup>61</sup> | USA     | 105  | 52 (49·5)     | 69(23, 97)     | 98  | NA | 51  | NA | Hospitalized                             | 12 |
| Wan, S et al. <sup>62</sup>      | China   | 135  | 63 (46·7)     | 47(36, 55)     | 43  | NA | 40  | NA | Hospitalized                             | 13 |
| Li, J et al. <sup>63</sup>       | China   | 94   | 43 (45·7)     | 58·7 ± 16      | 39  | NA | NA  | 13 | Hospitalized                             | 10 |
| Cao, M et al. <sup>64</sup>      | China   | 198  | 97 (49)       | 50·1 ±<br>16·3 | 69  | NA | 19  | NA | Hospitalized                             | 12 |
| Sun, L et al. <sup>65</sup>      | China   | 55   | 24 (43·6)     | 44 (34,<br>56) | 18  | NA | 15  | NA | Hospitalized                             | 11 |
| Huang, R et al. <sup>66</sup>    | China   | 202  | 86 (42·6)     | 44 (33,<br>54) | 55  | NA | 23  | NA | Hospitalized                             | 12 |
| Labenz, C et al. <sup>67</sup>   | Germany | 42   | 13 (31)       | 68 (55,<br>75) | NA  | NA | NA  | NA | Hospitalized                             | 11 |
| Zhang, JJ et al. <sup>68</sup>   | China   | 289  | 135<br>(46·7) | 57 (22,<br>88) | 169 | NA | 127 | 49 | Hospitalized                             | 13 |
| Pérez, FM et al. <sup>69</sup>   | Spain   | 96   | 33 (34·4)     | 63 ± 17        | 60  | NA | 17  | NA | Hospitalized                             | 10 |
| Wang, L et al. <sup>70</sup>     | China   | 116  | 49 (42·2)     | 54 (38–<br>69) | 51  | NA | NA  | 7  | Hospitalized                             | 13 |
| Wang, D et al. <sup>71</sup>     | China   | 143  | 70 (49)       | 58 (39–<br>67) | 50  | NA | 71  | NA | Hospitalized                             | 12 |
| Güner, R et al. <sup>72</sup>    | Turkey  | 222  | 90 (73·8)     | 50·6 ±<br>16·5 | 92  | NA | 50  | NA | Hospitalized                             | 12 |
| Zhou, Y et al. <sup>73</sup>     | China   | 304  | 166<br>(54·6) | 61·5 ±<br>13·3 | NA  | NA | NA  | NA | Hospitalized                             | 12 |
| Feng, Y et al. <sup>74</sup>     | China   | 476  | 205<br>(43·1) | 53 (40,<br>64) | 205 | NA | 124 | NA | Hospitalized                             | 12 |

|                                          |                 |       |                |                |      |      |      |      |                                          |    |
|------------------------------------------|-----------------|-------|----------------|----------------|------|------|------|------|------------------------------------------|----|
| Brill, SE et al. <sup>75</sup>           | UK              | 450   | 178<br>(39.6)  | 72 (56,<br>83) | NA   | NA   | NA   | NA   | Hospitalized                             | 12 |
| Shah, P et al. <sup>76</sup>             | USA             | 522   | 304<br>(58.2)  | 63 (50,<br>72) | NA   | NA   | NA   | NA   | Hospitalized                             | 13 |
| Lagi, F et al. <sup>77</sup>             | Italy           | 84    | 29 (34.5)      | 62 (51,<br>72) | 49   | NA   | NA   | NA   | Hospitalized                             | 12 |
| Yang, Q et al. <sup>78</sup>             | China           | 226   | 113 (50)       | 49.9 ±<br>15.3 | NA   | NA   | NA   | NA   | Hospitalized                             | 12 |
| Ji, W et al. <sup>79</sup>               | South<br>Korea  | 7341  | 4371<br>(59.5) | 47.1 ±<br>19.0 | NA   | NA   | NA   | NA   | Hospitalized<br>and non-<br>hospitalized | 13 |
| Lee, JY et al. <sup>80</sup>             | South<br>Korea  | 694   | 482<br>(69.5)  | 55.9 ±<br>17.3 | NA   | NA   | NA   | NA   | Hospitalized                             | 13 |
| Shahriarirad, R et al. <sup>81</sup>     | Iran            | 113   | 42 (37.2)      | 53.7 ±<br>16.6 | 44   | NA   | NA   | NA   | Hospitalized                             | 12 |
| Baqui, P et al. <sup>82</sup>            | Brazil          | 7371  | 3081<br>(41.8) | 58.3 ±<br>16.4 | NA   | NA   | NA   | NA   | Hospitalized                             | 12 |
| Asfahan, S et al. <sup>83</sup>          | India           | 20812 | NA             | NA             | 5276 | NA   | NA   | 504  | Hospitalized<br>and non-<br>hospitalized | 12 |
| Petrilli, CM et al. <sup>84</sup>        | USA             | 2729  | 1057<br>(38.7) | 63 (51,<br>74) | 2176 | NA   | 990  | NA   | Hospitalized                             | 14 |
| Mendy, A et al. <sup>85</sup>            | USA             | 689   | 324 (47)       | 49.5 ±<br>33.1 | NA   | NA   | NA   | NA   | Hospitalized                             | 12 |
| Masetti, C et al. <sup>86</sup>          | Italy           | 229   | 81 (35.4)      | 60.7 ±<br>14.2 | 124  | NA   | NA   | 33   | Hospitalized                             | 12 |
| Davies, MA et al. <sup>87</sup>          | South<br>Africa | 2978  | 1848<br>(62.1) | NA             | NA   | NA   | NA   | NA   | Hospitalized                             | 13 |
| Huang, J et al. <sup>88</sup>            | China           | 299   | 139<br>(46.5)  | 53.4 ±<br>16.7 | 99   | NA   | NA   | 16   | Hospitalized                             | 12 |
| Kammar-Garcia,<br>A et al. <sup>89</sup> | Mexico          | 13842 | 5853<br>(42.3) | 46.6 ±<br>15.6 | 6270 | 1282 | 4098 | 1305 | Hospitalized                             | 12 |
| Ye, C et al. <sup>90</sup>               | China           | 856   | 417<br>(48.7)  | 46 (35-56)     | 242  | 63   | 154  | 1    | Hospitalized                             | 13 |
| Bonetti, G et al. <sup>91</sup>          | Italy           | 144   | 49 (34)        | 70             | 92   | NA   | NA   | 70   | Hospitalized                             | 12 |
| Ponziani, FR et al. <sup>92</sup>        | Italy           | 515   | 192<br>(37.3)  | 65 (53,<br>77) | 350  | 32   | 77   | NA   | Hospitalized                             | 13 |
| Klang, E et al. <sup>93</sup>            | USA             | 3406  | 1445<br>(42.4) | 65.94          | 3126 | NA   | NA   | 1136 | Hospitalized                             | 13 |



|                                     |             |      |                |                 |      |     |     |      |              |    |
|-------------------------------------|-------------|------|----------------|-----------------|------|-----|-----|------|--------------|----|
| Sousa, GJB et al. <sup>94</sup>     | Brazil      | 2070 | 1053<br>(50.9) | 44 ( 34,<br>59) | NA   | NA  | NA  | NA   | Hospitalized | 13 |
| Brouns, SH et al. <sup>95</sup>     | Netherlands | 101  | 68 (67.3)      | 85.0 ± 8.1      | NA   | NA  | NA  | NA   | Hospitalized | 11 |
| Lorente-Ros, A et al. <sup>96</sup> | Spain       | 707  | 264<br>(37.3)  | 66.6 ±<br>15.7  | NA   | NA  | NA  | NA   | Hospitalized | 14 |
| Tatum, D et al. <sup>97</sup>       | USA         | 125  | 68 (54.4)      | 58.7 ±<br>14.8  | 120  | NA  | NA  | 23   | Hospitalized | 13 |
| Sabri, A et al. <sup>98</sup>       | Iran        | 63   | NA             | 54.1 ±<br>15.5  | 37   | NA  | NA  | NA   | Hospitalized | 11 |
| Cai, Q et al. <sup>99</sup>         | China       | 383  | 200<br>(52.2)  | 49.2            | NA   | NA  | NA  | NA   | Hospitalized | 12 |
| Pettit, NN et al. <sup>100</sup>    | USA         | 238  | 125<br>(52.5)  | 58.5 ± 17       | NA   | NA  | NA  | NA   | Hospitalized | 12 |
| Ji, D et al. <sup>101</sup>         | China       | 208  | 91 (43.8)      | 44.0 ±<br>16.3  | 45   | NA  | 40  | NA   | Hospitalized | 12 |
| Gidari, A et al. <sup>102</sup>     | Italy       | 68   | 23 (33.8)      | 64 ± 14         | NA   | NA  | NA  | NA   | Hospitalized | 11 |
| Du, RH et al. <sup>103</sup>        | China       | 179  | 82 (45.8)      | 57.6 ±<br>13.7  | NA   | NA  | NA  | NA   | Hospitalized | 13 |
| Sarin, SK et al. <sup>104</sup>     | Asia        | 228  | 96 (42.1)      | 51.1            | NA   | NA  | NA  | NA   | Hospitalized | 12 |
| Ebinger, JE et al. <sup>105</sup>   | USA         | 442  | 186<br>(42.1)  | 52.7 ±<br>19.6  | NA   | NA  | NA  | NA   | Hospitalized | 12 |
| Pagnesi, M et al. <sup>106</sup>    | Italy       | 200  | 69 (34.5)      | 62 (55,<br>74)  | NA   | NA  | NA  | NA   | Hospitalized | 14 |
| Rastad, H et al. <sup>107</sup>     | Iran        | 2957 | 1368<br>(46.3) | 54.8 ±<br>16.9  | 749  | NA  | NA  | 301  | Hospitalized | 13 |
| van Gerwen, M et al. <sup>108</sup> | USA         | 3703 | 1654<br>(44.7) | 56.8 ±<br>18.2  | 2398 | 322 | 525 | 616  | Hospitalized | 13 |
| Zhou, Y et al. <sup>109</sup>       | China       | 17   | 11 (64.7)      | 41.8            | 5    | NA  | 5   | NA   | Hospitalized | 11 |
| Grasselli, G et al. <sup>110</sup>  | Italy       | 3988 | 800<br>(20.1)  | 63 (56,<br>69)  | 2686 | NA  | NA  | 1926 | Hospitalized | 13 |
| Xu, PP et al. <sup>111</sup>        | China       | 703  | 321<br>(45.7)  | 46.1 ±<br>15.2  | 201  | 24  | 55  | 33   | Hospitalized | 13 |
| Cen, Y et al. <sup>112</sup>        | China       | 1007 | 514 (51)       | 61 (49 ,<br>68) | 364  | NA  | 222 | 43   | Hospitalized | 14 |
| Soares, RCM et al. <sup>113</sup>   | Brazil      | 1152 | 494<br>(42.9)  | NA              | 526  | NA  | NA  | 456  | Hospitalized | 10 |
| Li, X et al. <sup>114</sup>         | China       | 548  | 269<br>(49.1)  | 60 (48,<br>69)  | NA   | NA  | NA  | NA   | Hospitalized | 14 |

|                                           |             |      |                |                |     |    |    |    |                                   |    |
|-------------------------------------------|-------------|------|----------------|----------------|-----|----|----|----|-----------------------------------|----|
| Gao, S et al. <sup>115</sup>              | China       | 210  | 109<br>(51.9)  | 71 (67,<br>77) | 159 | NA | NA | 35 | Hospitalized                      | 12 |
| Urrea, JM et al. <sup>116</sup>           | Spain       | 172  | 68 (39.5)      | 59.1           | NA  | NA | NA | NA | Hospitalized                      | 12 |
| Rivera-Izquierdo, M et al. <sup>117</sup> | Spain       | 238  | 107 (45)       | 64.7 ±<br>15.4 | 135 | NA | NA | 61 | Hospitalized                      | 12 |
| Deng, Q et al. <sup>118</sup>             | China       | 112  | 55 (49.1)      | 65 (49,<br>71) | 58  | NA | NA | 14 | Hospitalized                      | 12 |
| Kim, DW et al. <sup>119</sup>             | South Korea | 9148 | 5592<br>(61.0) | NA             | NA  | NA | NA | NA | Hospitalized and non-hospitalized | 13 |
| Hewitt, J et al. <sup>120</sup>           | UK & Italy  | 1564 | 661<br>(42.3)  | 74 (61,<br>83) | NA  | NA | NA | NA | Hospitalized                      | 14 |

NA not available.

#### Supplementary Table 2

Quality appraisal of included studies according to MINORS assessment

| Study                         | Clearly stated aim | Inclusion of consecutive patients | Prospective collection of data | Endpoints appropriate to the aim of the study | Unbiased assessment of the study endpoint | Follow-up period appropriate to the aim of the study | Loss to follow up less than 5% | Prospective Calculation of the study size |
|-------------------------------|--------------------|-----------------------------------|--------------------------------|-----------------------------------------------|-------------------------------------------|------------------------------------------------------|--------------------------------|-------------------------------------------|
| Wang, L et al. <sup>1</sup>   | 2                  | 2                                 | 1                              | 2                                             | 0                                         | 2                                                    | 2                              | 1                                         |
| Cao, J et al. <sup>2</sup>    | 2                  | 2                                 | 2                              | 2                                             | 0                                         | 2                                                    | 2                              | 1                                         |
| Chen, T et al. <sup>3</sup>   | 2                  | 2                                 | 1                              | 2                                             | 0                                         | 2                                                    | 2                              | 1                                         |
| Deng, Y et al. <sup>4</sup>   | 2                  | 2                                 | 1                              | 2                                             | 0                                         | 2                                                    | 2                              | 1                                         |
| Yuan, M et al. <sup>5</sup>   | 2                  | 2                                 | 1                              | 2                                             | 0                                         | 2                                                    | 1                              | 0                                         |
| Wu, C et al. <sup>6</sup>     | 2                  | 2                                 | 1                              | 2                                             | 0                                         | 2                                                    | 2                              | 1                                         |
| Li, K et al. <sup>7</sup>     | 2                  | 2                                 | 1                              | 2                                             | 0                                         | 2                                                    | 2                              | 1                                         |
| Yang, X et al. <sup>8</sup>   | 2                  | 2                                 | 1                              | 2                                             | 0                                         | 2                                                    | 2                              | 0                                         |
| Zhang, JJ et al. <sup>9</sup> | 2                  | 2                                 | 2                              | 2                                             | 0                                         | 2                                                    | 2                              | 1                                         |
| Wang, D et al. <sup>10</sup>  | 2                  | 2                                 | 2                              | 2                                             | 0                                         | 2                                                    | 2                              | 1                                         |
| Huang, C et al. <sup>11</sup> | 2                  | 2                                 | 2                              | 2                                             | 0                                         | 2                                                    | 2                              | 0                                         |
| Wang, Z et al. <sup>12</sup>  | 2                  | 2                                 | 2                              | 2                                             | 0                                         | 2                                                    | 2                              | 0                                         |
| Guan, WJ et al. <sup>13</sup> | 2                  | 2                                 | 1                              | 2                                             | 0                                         | 2                                                    | 2                              | 2                                         |

|                                                   |   |   |   |   |   |   |   |   |
|---------------------------------------------------|---|---|---|---|---|---|---|---|
| Chen, T et al. <sup>14</sup>                      | 2 | 2 | 1 | 2 | 0 | 2 | 2 | 0 |
| Chen, Q et al. <sup>15</sup>                      | 2 | 2 | 1 | 2 | 0 | 2 | 2 | 1 |
| Zhang, G et al. <sup>16</sup>                     | 2 | 2 | 1 | 2 | 0 | 2 | 2 | 1 |
| Zhang, R et al. <sup>17</sup>                     | 2 | 2 | 1 | 2 | 0 | 2 | 2 | 1 |
| Nikpouraghdam, M et al. <sup>18</sup>             | 2 | 2 | 1 | 2 | 0 | 0 | 0 | 2 |
| Li, Y et al. <sup>19</sup>                        | 2 | 2 | 1 | 2 | 0 | 2 | 2 | 0 |
| Zhou, F et al. <sup>20</sup>                      | 2 | 2 | 1 | 2 | 0 | 2 | 2 | 1 |
| He, R et al. <sup>36</sup>                        | 2 | 2 | 1 | 2 | 0 | 2 | 2 | 1 |
| Yang, AP et al. <sup>22</sup>                     | 2 | 2 | 1 | 2 | 0 | 2 | 2 | 0 |
| Borobia, AM et al. <sup>23</sup>                  | 2 | 2 | 2 | 2 | 0 | 1 | 2 | 2 |
| Zhang, C et al. <sup>24</sup>                     | 2 | 2 | 1 | 2 | 0 | 2 | 2 | 0 |
| Zhao, J et al. <sup>25</sup>                      | 2 | 2 | 1 | 2 | 0 | 2 | 2 | 0 |
| Yao, Q et al. <sup>26</sup>                       | 2 | 2 | 1 | 2 | 0 | 2 | 2 | 2 |
| Kayem, G et al. <sup>27</sup>                     | 2 | 2 | 1 | 2 | 0 | 0 | 0 | 2 |
| Tambe, MP et al. <sup>28</sup>                    | 2 | 2 | 2 | 2 | 0 | 2 | 2 | 1 |
| Yang, Q et al. <sup>29</sup>                      | 2 | 2 | 1 | 2 | 0 | 2 | 2 | 1 |
| Şenkal, N et al. <sup>30</sup>                    | 2 | 2 | 1 | 2 | 0 | 2 | 2 | 2 |
| Shi, S et al. <sup>31</sup>                       | 2 | 2 | 1 | 2 | 0 | 2 | 2 | 1 |
| Mani, VR et al. <sup>32</sup>                     | 2 | 2 | 1 | 2 | 0 | 2 | 2 | 1 |
| Li, M et al. <sup>33</sup>                        | 2 | 2 | 1 | 2 | 0 | 2 | 2 | 0 |
| Salacup, G et al. <sup>34</sup>                   | 2 | 2 | 1 | 2 | 0 | 2 | 2 | 1 |
| Shi, S et al. <sup>35</sup>                       | 2 | 2 | 1 | 2 | 0 | 2 | 2 | 2 |
| Kalyanaraman<br>Marcello, R. et al. <sup>36</sup> | 2 | 2 | 1 | 2 | 0 | 2 | 2 | 2 |
| Israelsen, SB et al. <sup>37</sup>                | 2 | 2 | 1 | 2 | 0 | 2 | 2 | 1 |
| Pellaud, C et al. <sup>38</sup>                   | 2 | 2 | 1 | 2 | 0 | 2 | 2 | 1 |
| Gregoriano, C et al. <sup>39</sup>                | 2 | 2 | 1 | 2 | 0 | 2 | 2 | 0 |
| Argenziano, MG et al. <sup>40</sup>               | 2 | 2 | 1 | 2 | 0 | 2 | 2 | 2 |
| Borghesi, A et al. <sup>41</sup>                  | 2 | 2 | 1 | 2 | 0 | 2 | 2 | 1 |
| Toussie, D et al. <sup>42</sup>                   | 2 | 2 | 1 | 2 | 0 | 2 | 2 | 1 |

|                                        |   |   |   |   |   |   |   |   |
|----------------------------------------|---|---|---|---|---|---|---|---|
| Ortiz-Brizuela, E et al. <sup>43</sup> | 2 | 2 | 2 | 2 | 0 | 2 | 2 | 1 |
| Aggarwal, A et al. <sup>44</sup>       | 2 | 2 | 1 | 2 | 0 | 2 | 2 | 0 |
| Javanian, M et al. <sup>45</sup>       | 2 | 2 | 1 | 2 | 0 | 2 | 2 | 1 |
| Huang, Q et al. <sup>46</sup>          | 2 | 2 | 1 | 2 | 0 | 2 | 2 | 0 |
| Pelayo, J et al. <sup>47</sup>         | 2 | 2 | 1 | 2 | 0 | 2 | 2 | 1 |
| Alkundi, A et al. <sup>48</sup>        | 2 | 2 | 1 | 2 | 0 | 2 | 2 | 1 |
| Qin, C et al. <sup>49</sup>            | 2 | 2 | 1 | 2 | 0 | 2 | 2 | 2 |
| Chen, Y et al. <sup>50</sup>           | 2 | 2 | 1 | 2 | 0 | 2 | 2 | 2 |
| Khamis, F et al. <sup>51</sup>         | 2 | 2 | 2 | 2 | 0 | 2 | 2 | 0 |
| Gayam, V et al. <sup>52</sup>          | 2 | 2 | 1 | 2 | 0 | 2 | 2 | 1 |
| Shi, Q et al. <sup>53</sup>            | 2 | 2 | 1 | 2 | 0 | 2 | 2 | 1 |
| Nowak, B et al. <sup>54</sup>          | 2 | 2 | 1 | 2 | 0 | 2 | 2 | 1 |
| Rottoli, M et al. <sup>55</sup>        | 2 | 2 | 1 | 2 | 0 | 2 | 2 | 1 |
| Huang, Y et al. <sup>56</sup>          | 1 | 2 | 1 | 1 | 0 | 2 | 2 | 0 |
| Li, T et al. <sup>57</sup>             | 2 | 2 | 1 | 2 | 0 | 2 | 2 | 1 |
| Zhou, X et al. <sup>58</sup>           | 2 | 2 | 1 | 2 | 0 | 2 | 2 | 1 |
| Wu, F et al. <sup>59</sup>             | 1 | 2 | 1 | 2 | 0 | 2 | 2 | 2 |
| Xu, J et al. <sup>60</sup>             | 2 | 2 | 1 | 2 | 0 | 2 | 2 | 1 |
| Buckner, FS et al. <sup>61</sup>       | 2 | 2 | 1 | 2 | 0 | 2 | 2 | 1 |
| Wan, S et al. <sup>62</sup>            | 2 | 2 | 2 | 2 | 0 | 2 | 2 | 1 |
| Li, J et al. <sup>63</sup>             | 2 | 2 | 1 | 1 | 0 | 2 | 2 | 0 |
| Cao, M et al. <sup>64</sup>            | 2 | 2 | 1 | 2 | 0 | 2 | 2 | 1 |
| Sun, L et al. <sup>65</sup>            | 2 | 2 | 1 | 2 | 0 | 2 | 2 | 0 |
| Huang, R et al. <sup>66</sup>          | 2 | 2 | 1 | 2 | 0 | 2 | 2 | 1 |
| Labenz, C et al. <sup>67</sup>         | 2 | 2 | 1 | 2 | 0 | 2 | 2 | 0 |
| Zhang, JJ et al. <sup>68</sup>         | 2 | 2 | 2 | 2 | 0 | 2 | 2 | 1 |
| Pérez, FM et al. <sup>69</sup>         | 2 | 2 | 0 | 2 | 0 | 2 | 2 | 0 |
| Wang, L et al. <sup>70</sup>           | 2 | 2 | 2 | 2 | 0 | 2 | 2 | 1 |
| Wang, D et al. <sup>71</sup>           | 2 | 2 | 1 | 2 | 0 | 2 | 2 | 1 |
| Güner, R et al. <sup>72</sup>          | 2 | 2 | 1 | 2 | 0 | 2 | 2 | 1 |

|                                          |   |   |   |   |   |   |   |   |
|------------------------------------------|---|---|---|---|---|---|---|---|
| Zhou, Y et al. <sup>78</sup>             | 2 | 2 | 1 | 2 | 0 | 2 | 2 | 1 |
| Feng, Y et al. <sup>74</sup>             | 2 | 2 | 1 | 2 | 0 | 2 | 2 | 1 |
| Brill, SE et al. <sup>75</sup>           | 2 | 2 | 1 | 2 | 0 | 2 | 2 | 1 |
| Shah, P et al. <sup>81</sup>             | 2 | 2 | 1 | 2 | 0 | 2 | 2 | 2 |
| Lagi, F et al. <sup>77</sup>             | 2 | 2 | 1 | 2 | 0 | 2 | 2 | 1 |
| Yang, Q et al. <sup>78</sup>             | 2 | 2 | 1 | 2 | 0 | 2 | 2 | 1 |
| Ji, W et al. <sup>79</sup>               | 2 | 2 | 1 | 2 | 0 | 2 | 2 | 2 |
| Lee, JY et al. <sup>80</sup>             | 2 | 2 | 1 | 2 | 0 | 2 | 2 | 2 |
| Shahriarirad, R et al. <sup>81</sup>     | 2 | 2 | 1 | 2 | 0 | 2 | 2 | 1 |
| Baqui, P et al. <sup>82</sup>            | 2 | 2 | 0 | 2 | 0 | 2 | 2 | 2 |
| Asfahan, S et al. <sup>83</sup>          | 2 | 1 | 1 | 2 | 0 | 2 | 2 | 2 |
| Petrilli, CM et al. <sup>84</sup>        | 2 | 2 | 2 | 2 | 0 | 2 | 2 | 2 |
| Mendy, A et al. <sup>85</sup>            | 2 | 2 | 0 | 2 | 0 | 2 | 2 | 2 |
| Masetti, C et al. <sup>86</sup>          | 2 | 2 | 1 | 2 | 0 | 2 | 2 | 1 |
| Davies, MA et al. <sup>87</sup>          | 2 | 2 | 1 | 2 | 0 | 2 | 2 | 2 |
| Huang, J et al. <sup>88</sup>            | 2 | 2 | 1 | 2 | 0 | 2 | 2 | 1 |
| Kammar-Garcia,<br>A et al. <sup>89</sup> | 2 | 2 | 0 | 2 | 0 | 2 | 2 | 2 |
| Ye, C et al. <sup>90</sup>               | 2 | 2 | 1 | 2 | 0 | 2 | 2 | 2 |
| Bonetti, G et al. <sup>91</sup>          | 2 | 2 | 1 | 2 | 0 | 2 | 2 | 1 |
| Ponziani, FR et al. <sup>92</sup>        | 2 | 2 | 1 | 2 | 0 | 2 | 2 | 2 |
| Klang, E et al. <sup>93</sup>            | 2 | 2 | 1 | 2 | 0 | 2 | 2 | 2 |
| Sousa, GJB et al. <sup>94</sup>          | 2 | 2 | 1 | 2 | 0 | 2 | 2 | 2 |
| Brouns, SH et al. <sup>95</sup>          | 2 | 2 | 0 | 2 | 0 | 2 | 2 | 1 |
| Lorente-Ros, A et al. <sup>96</sup>      | 2 | 2 | 2 | 2 | 0 | 2 | 2 | 2 |
| Tatum, D et al. <sup>97</sup>            | 2 | 2 | 2 | 2 | 0 | 2 | 2 | 1 |
| Sabri, A et al. <sup>98</sup>            | 2 | 2 | 1 | 2 | 0 | 2 | 2 | 0 |
| Cai, Q et al. <sup>99</sup>              | 2 | 2 | 1 | 2 | 0 | 2 | 2 | 1 |
| Pettit, NN et al. <sup>100</sup>         | 2 | 2 | 1 | 2 | 0 | 2 | 2 | 1 |
| Ji, D et al. <sup>101</sup>              | 2 | 2 | 1 | 2 | 0 | 2 | 2 | 1 |

|                                           |   |   |   |   |   |   |   |   |
|-------------------------------------------|---|---|---|---|---|---|---|---|
| Gidari, A et al. <sup>102</sup>           | 2 | 2 | 1 | 2 | 0 | 2 | 2 | 0 |
| Du, RH et al. <sup>103</sup>              | 2 | 2 | 2 | 2 | 0 | 2 | 2 | 1 |
| Sarin, SK et al. <sup>104</sup>           | 2 | 2 | 1 | 2 | 0 | 2 | 2 | 1 |
| Ebinger, JE et al. <sup>105</sup>         | 2 | 2 | 1 | 2 | 0 | 2 | 2 | 1 |
| Pagnesi, M et al. <sup>106</sup>          | 2 | 2 | 2 | 2 | 0 | 2 | 2 | 2 |
| Rastad, H et al. <sup>107</sup>           | 2 | 2 | 1 | 2 | 0 | 2 | 2 | 2 |
| van Gerwen, M et al. <sup>108</sup>       | 2 | 2 | 1 | 2 | 0 | 2 | 2 | 2 |
| Zhou, Y et al. <sup>109</sup>             | 2 | 2 | 1 | 2 | 0 | 2 | 2 | 0 |
| Grasselli, G et al. <sup>110</sup>        | 2 | 2 | 1 | 2 | 0 | 2 | 2 | 2 |
| Xu, PP et al. <sup>111</sup>              | 2 | 2 | 1 | 2 | 0 | 2 | 2 | 2 |
| Cen, Y et al. <sup>112</sup>              | 2 | 2 | 2 | 2 | 0 | 2 | 2 | 2 |
| Soares, RCM et al. <sup>113</sup>         | 2 | 2 | 0 | 2 | 0 | 0 | 2 | 2 |
| Li, X et al. <sup>114</sup>               | 2 | 2 | 2 | 2 | 0 | 2 | 2 | 2 |
| Gao, S et al. <sup>115</sup>              | 2 | 2 | 1 | 2 | 0 | 2 | 2 | 1 |
| Urrea, JM et al. <sup>116</sup>           | 2 | 2 | 1 | 2 | 0 | 2 | 2 | 1 |
| Rivera-Izquierdo, M et al. <sup>117</sup> | 2 | 2 | 1 | 2 | 0 | 2 | 2 | 1 |
| Deng, Q et al. <sup>118</sup>             | 2 | 2 | 1 | 2 | 0 | 2 | 2 | 1 |
| Kim, DW et al. <sup>119</sup>             | 2 | 2 | 1 | 2 | 0 | 2 | 2 | 2 |
| Hewitt, J et al. <sup>120</sup>           | 2 | 2 | 2 | 2 | 0 | 2 | 2 | 2 |

Supplementary Table 3

Assessment of publication bias and small study effect for primary outcomes

|                         | Comorbidities       |         | Severity           |         | Mortality           |         |
|-------------------------|---------------------|---------|--------------------|---------|---------------------|---------|
|                         | Beta (95% CI)       | p-value | Beta (95% CI)      | p-value | Beta (95% CI)       | p-value |
| One comorbidity         | 1.83 (-0.30, 3.97)  | 0.09    | 0.48 (-0.55, 1.51) | 0.35    | 1.07 (-1.06, 3.20)  | 0.32    |
| No comorbidity          | -1.87 (-4.07, 0.33) | 0.09    | 0.22 (-0.54, 0.97) | 0.56    | 1.17 (-0.04, 2.39)  | 0.06    |
| Multiple comorbidities  | 0.29 (-8.61, 9.20)  | 0.94    | 0.06 (-4.88, 5.00) | 0.98    | -1.36 (-3.61, 0.88) | 0.18    |
| HTN                     | 1.62 (0.06, 3.17)   | 0.041   | 0.78 (0.19, 1.37)  | 0.011   | 0.65 (-0.85, 2.14)  | 0.39    |
| DM                      | 0.71 (-0.39, 1.81)  | 0.20    | 0.80 (0.34, 1.27)  | 0.001   | -0.16 (-1.4, 1.09)  | 0.80    |
| CVD                     | 0.19 (-1.27, 1.64)  | 0.8     | 1.00 (0.53, 1.46)  | < 0.001 | -0.19 (-1.28, 0.9)  | 0.73    |
| Obesity                 | 4.68 (0.34, 9.02)   | 0.036   | 0.71 (-1.24, 2.66) | 0.45    | 0.47 (-2.31, 3.25)  | 0.71    |
| CVA                     | -0.13 (-0.52, 0.26) | 0.50    | 0.69 (0.18, 1.20)  | 0.011   | 0.75 (-0.16, 1.65)  | 0.10    |
| Lung disease            | 0.22 (-0.54, 0.99)  | 0.56    | 0.85 (0.47, 1.23)  | < 0.001 | 0.52 (-0.33, 1.36)  | 0.22    |
| Cancer/malignancy       | 0.48 (-0.18, 1.13)  | 0.15    | 0.42 (-0.07, 0.90) | 0.09    | -0.12 (-0.82, 0.58) | 0.73    |
| CKD/other renal disease | 0.38 (-0.72, 1.48)  | 0.49    | 0.51 (-0.24, 1.26) | 0.17    | 0.28 (-0.83, 1.40)  | 0.61    |
| Liver disease           | 0.30 (-0.77, 1.37)  | 0.57    | 0.34 (0.04, 0.64)  | 0.026   | 0.67 (-0.43, 1.77)  | 0.22    |

Beta regression coefficient, CI confidence interval, HTN Hypertension, DM Diabetes mellitus, CVD Cardiovascular disease, CVA Cerebrovascular accident, CKD Chronic kidney disease.

Supplementary Table 4

Demographic characteristics by geographic regions

| <b>Demographic characteristics</b>                                               | <b>Overall</b>                                 | <b>Asia</b>                                   | <b>Europe</b>                                | <b>Latin America</b>                          | <b>USA</b>                                   | <b>South Africa</b>                         |
|----------------------------------------------------------------------------------|------------------------------------------------|-----------------------------------------------|----------------------------------------------|-----------------------------------------------|----------------------------------------------|---------------------------------------------|
| Number of studies                                                                | 120                                            | 72                                            | 26                                           | 5                                             | 16                                           | 1                                           |
| Number of subjects (%)                                                           | 125446                                         | 63462<br>(50.6%)                              | 13929<br>(11.1%)                             | 24575<br>(19.6%)                              | 20602<br>(16.4%)                             | 2978<br>(2.4%)                              |
| Age; mean<br>(95% CI)                                                            | 56.2<br>(52.6, 59.8)                           | 54.4<br>(50.8, 58.0)                          | 64.8<br>(61.9, 67.8)                         | 50.2<br>(42.6, 57.9)                          | 60.4<br>(57.7, 63.1)                         | NA                                          |
| Gender <sup>§</sup><br>Total<br>Female<br>Meta-proportion of female;<br>(95% CI) | 104670<br>48446 (46.3)<br>0.45<br>(0.43, 0.47) | 42587<br>22056 (51.8)<br>0.47<br>(0.45, 0.50) | 13929<br>5386 (38.7)<br>0.39<br>(0.34, 0.45) | 24575<br>10536 (42.9)<br>0.44<br>(0.41, 0.48) | 20601<br>8620 (41.8)<br>0.45<br>(0.42, 0.47) | 2978<br>1848 (62.0)<br>0.62<br>(0.60, 0.64) |

NA Not available, CI confidence interval.

<sup>§</sup>Gender information was not available for 20875 patients from Asian study and 1 patient from a USA study, meta-proportion for female gender was calculated after excluding a European study that included only pregnant women.

Supplementary Table 5

Comparison of proportion estimates of underlying medical diseases and associated COVID-19 severity and mortality between geographic regions

|                      | <b>Asia vs.<br/>Europe</b> | <b>Asia vs. Latin<br/>America</b> | <b>Asia vs.<br/>USA</b> | <b>Europe vs. Latin<br/>America</b> | <b>Europe vs.<br/>USA</b> | <b>Latin America vs.<br/>USA</b> |
|----------------------|----------------------------|-----------------------------------|-------------------------|-------------------------------------|---------------------------|----------------------------------|
|                      | <b>p-value</b>             | <b>p-value</b>                    | <b>p-value</b>          | <b>p-value</b>                      | <b>p-value</b>            | <b>p-value</b>                   |
| <b>Comorbidities</b> |                            |                                   |                         |                                     |                           |                                  |



|                         |        |       |        |       |        |       |
|-------------------------|--------|-------|--------|-------|--------|-------|
| One comorbidity         | <0.001 | 0.768 | <0.001 | 0.055 | 0.009  | 0.001 |
| Multiple comorbidities  | 0.273  | 0.837 | 0.056  | 0.309 | 0.677  | 0.124 |
| HTN                     | <0.001 | 0.659 | <0.001 | 0.583 | 0.045  | 0.235 |
| DM                      | 0.010  | 0.239 | <0.001 | 0.761 | <0.001 | 0.006 |
| CVD                     | <0.001 | 0.027 | <0.001 | 0.846 | 0.113  | 0.221 |
| Obesity                 | 0.257  | 0.640 | 0.640  | 0.287 | 0.006  | 0.001 |
| CVA                     | 0.852  | NA    | 0.119  | 0.657 | 0.852  | 0.657 |
| Lung disease            | 0.002  | 0.936 | <0.001 | 0.047 | 0.036  | 0.001 |
| Cancer/malignancy       | <0.001 | NA    | <0.001 | NA    | 0.417  | NA    |
| CKD/other renal disease | 0.003  | 0.814 | <0.001 | 0.067 | 0.064  | 0.001 |
| Liver disease           | 0.673  | 0.601 | 0.580  | 0.950 | 0.972  | 0.911 |
| <b>Severity</b>         |        |       |        |       |        |       |
| Total                   | 0.526  | 0.897 | 0.046  | 0.629 | 0.052  | 0.328 |
| One comorbidity         | 0.021  | 0.914 | 0.296  | 0.209 | 0.235  | 0.649 |
| No comorbidity          | 0.250  | 0.611 | 0.463  | 0.640 | 0.598  | 0.985 |
| Multiple comorbidities  | 0.049  | 0.519 | 0.027  | 0.017 | 0.579  | 0.002 |
| HTN                     | 0.027  | 0.251 | 0.071  | 0.710 | 0.574  | 0.563 |
| DM                      | 0.037  | 0.711 | 0.022  | 0.761 | 0.914  | 0.787 |
| CVD                     | 0.158  | 0.447 | 0.033  | 0.615 | 0.522  | 0.711 |

|                         |       |        |        |       |       |       |
|-------------------------|-------|--------|--------|-------|-------|-------|
| Obesity                 | 0.447 | 0.816  | 0.582  | 0.730 | 0.665 | 0.878 |
| CVA                     | 0.531 | NA     | 0.026  | 0.713 | 0.531 | 0.713 |
| Lung disease            | 0.216 | 0.661  | 0.035  | 0.830 | 0.590 | 0.905 |
| Cancer/malignancy       | 0.535 | NA     | 0.715  | NA    | 0.751 | 0.751 |
| CKD/other renal disease | 0.027 | NA     | <0.001 | NA    | 0.583 | 0.583 |
| Liver disease           | 0.660 | 0.660  | 0.442  | 1.00  | 0.824 | 0.824 |
| <b>Mortality</b>        |       |        |        |       |       |       |
| Total                   | 0.045 | 0.436  | 0.427  | 0.546 | 0.450 | 0.943 |
| One comorbidity         | 0.096 | 0.558  | 0.866  | 0.576 | 0.293 | 0.721 |
| No comorbidity          | 0.112 | 0.221  | 0.943  | 0.957 | 0.313 | 0.389 |
| Multiple comorbidities  | 0.139 | NA     | 0.065  | 0.273 | NA    | 0.273 |
| HTN                     | 0.120 | NA     | 0.888  | NA    | 0.245 | 0.245 |
| DM                      | 0.001 | <0.001 | 0.340  | 0.131 | 0.025 | 0.001 |
| CVD                     | 0.033 | 0.011  | 0.145  | 0.299 | 0.616 | 0.170 |
| Obesity                 | 0.072 | NA     | 0.003  | 0.072 | 0.160 | 0.003 |
| CVA                     | NA    | NA     | 0.672  | NA    | NA    | 0.672 |
| Lung disease            | 0.218 | 0.060  | 0.465  | 0.360 | 0.075 | 0.023 |
| Cancer/malignancy       | 0.035 | NA     | 0.508  | 0.096 | 0.035 | 0.096 |
| CKD/other renal disease | 0.011 | <0.001 | 0.499  | 0.118 | 0.020 | 0.001 |

|               |       |       |       |       |       |       |
|---------------|-------|-------|-------|-------|-------|-------|
| Liver disease | 0.166 | 0.034 | 0.829 | 0.500 | 0.284 | 0.080 |
|---------------|-------|-------|-------|-------|-------|-------|

NA Not available, *HTN* Hypertension, *DM* Diabetes mellitus, *CVD* Cardiovascular disease, *CVA* Cerebrovascular accident, *CKD* Chronic kidney disease.

Supplementary Table 6

Comparison of proportion estimates of underlying medical diseases and associated COVID-19 severity and mortality between age groups

|                         | Age ≤ 50 years<br>Vs<br>50 years < Age ≤ 65<br>years | Age ≤ 50 years<br>Vs<br>Age > 65 years | 50 years < Age ≤ 65<br>years<br>vs.<br>Age > 65 years |
|-------------------------|------------------------------------------------------|----------------------------------------|-------------------------------------------------------|
|                         | p-value                                              | p-value                                | p-value                                               |
| <b>Comorbidities</b>    |                                                      |                                        |                                                       |
| One comorbidity         | <0.001                                               | <0.001                                 | 0.001                                                 |
| Multiple comorbidities  | 0.001                                                | 0.022                                  | 0.278                                                 |
| HTN                     | <0.001                                               | <0.001                                 | 0.001                                                 |
| DM                      | 0.023                                                | <0.001                                 | 0.008                                                 |
| CVD                     | 0.666                                                | <0.001                                 | <0.001                                                |
| Obesity                 | 0.094                                                | 0.286                                  | 0.562                                                 |
| CVA                     | 0.405                                                | 0.157                                  | 0.070                                                 |
| Lung disease            | 0.257                                                | 0.018                                  | 0.076                                                 |
| Cancer/malignancy       | 0.047                                                | 0.004                                  | 0.068                                                 |
| CKD/other renal disease | 0.273                                                | <0.001                                 | <0.001                                                |
| Liver disease           | 0.474                                                | 0.935                                  | 0.542                                                 |
| <b>Severity</b>         |                                                      |                                        |                                                       |

|                         |       |       |       |
|-------------------------|-------|-------|-------|
| One comorbidity         | 0.886 | 0.866 | 0.790 |
| No comorbidity          | 0.127 | 0.482 | 0.884 |
| Multiple comorbidities  | 0.001 | NA    | NA    |
| HTN                     | 0.981 | 0.646 | 0.610 |
| DM                      | 0.850 | 0.511 | 0.557 |
| CVD                     | 0.423 | 0.764 | 0.712 |
| Obesity                 | 0.991 | 0.508 | 0.471 |
| CVA                     | 0.442 | 0.893 | 0.667 |
| Lung disease            | 0.362 | 0.631 | 0.927 |
| Cancer/malignancy       | 0.486 | 0.615 | 0.331 |
| CKD/other renal disease | 0.122 | 0.161 | 0.799 |
| Liver disease           | 0.977 | 0.629 | 0.625 |
| <b>Mortality</b>        |       |       |       |
| One comorbidity         | 0.153 | 0.010 | 0.064 |
| No comorbidity          | 0.110 | 0.054 | 0.311 |
| Multiple comorbidities  | 0.205 | 0.558 | 0.885 |
| HTN                     | 0.635 | 0.447 | 0.610 |
| DM                      | 0.794 | 0.823 | 0.479 |
| CVD                     | 0.580 | 0.246 | 0.297 |

|                         |       |       |       |
|-------------------------|-------|-------|-------|
| Obesity                 | 0.615 | 0.743 | 0.442 |
| CVA                     | 0.416 | 0.199 | 0.296 |
| Lung disease            | 0.744 | 0.716 | 0.187 |
| Cancer/malignancy       | 0.319 | 0.254 | 0.651 |
| CKD/other renal disease | 0.534 | 0.319 | 0.447 |
| Liver disease           | 0.318 | 0.503 | 0.957 |

NA Not available, *HTN* Hypertension, *DM* Diabetes mellitus, *CVD* Cardiovascular disease, *CVA* Cerebrovascular accident, *CKD* Chronic kidney disease.

## References

- 1 Wang, L. *et al.* Coronavirus disease 2019 in elderly patients: Characteristics and prognostic factors based on 4-week follow-up. *J Infect* **80**, 639-645, doi:10.1016/j.jinf.2020.03.019 (2020).
- 2 Cao, J. *et al.* Clinical Features and Short-term Outcomes of 102 Patients with Coronavirus Disease 2019 in Wuhan, China. *Clin Infect Dis* **71**, 748-755, doi:10.1093/cid/ciaa243 (2020).
- 3 Chen, T. *et al.* Clinical characteristics of 113 deceased patients with coronavirus disease 2019: retrospective study. *BMJ* **368**, m1091, doi:10.1136/bmj.m1091 (2020).
- 4 Deng, Y. *et al.* Clinical characteristics of fatal and recovered cases of coronavirus disease 2019 in Wuhan, China: a retrospective study. *Chin Med J (Engl)* **133**, 1261-1267, doi:10.1097/CM9.0000000000000824 (2020).
- 5 Yuan, M., Yin, W., Tao, Z., Tan, W. & Hu, Y. Association of radiologic findings with mortality of patients infected with 2019 novel coronavirus in Wuhan, China. *PLoS One* **15**, e0230548, doi:10.1371/journal.pone.0230548 (2020).
- 6 Wu, C. *et al.* Risk Factors Associated With Acute Respiratory Distress Syndrome and Death in Patients With Coronavirus Disease 2019 Pneumonia in Wuhan, China. *JAMA Intern Med* **180**, 934-943, doi:10.1001/jamainternmed.2020.0994 (2020).
- 7 Li, K. *et al.* The Clinical and Chest CT Features Associated With Severe and Critical COVID-19 Pneumonia. *Invest Radiol* **55**, 327-331, doi:10.1097/RLI.0000000000000672 (2020).
- 8 Yang, X. *et al.* Clinical course and outcomes of critically ill patients with SARS-CoV-2 pneumonia in Wuhan, China: a single-centered, retrospective, observational study. *Lancet Respir Med* **8**, 475-481, doi:10.1016/S2213-2600(20)30079-5 (2020).
- 9 Zhang, J. J. *et al.* Clinical characteristics of 140 patients infected with SARS-CoV-2 in Wuhan, China. *Allergy* **75**, 1730-1741, doi:10.1111/all.14238 (2020).
- 10 Wang, D. *et al.* Clinical Characteristics of 138 Hospitalized Patients With 2019 Novel Coronavirus-Infected Pneumonia in Wuhan, China. *JAMA* **323**, 1061-1069, doi:10.1001/jama.2020.1585 (2020).
- 11 Huang, C. *et al.* Clinical features of patients infected with 2019 novel coronavirus in Wuhan, China. *Lancet* **395**, 497-506, doi:10.1016/S0140-6736(20)30183-5 (2020).
- 12 Wang, Z., Yang, B., Li, Q., Wen, L. & Zhang, R. Clinical Features of 69 Cases With Coronavirus Disease 2019 in Wuhan, China. *Clin Infect Dis* **71**, 769-777, doi:10.1093/cid/ciaa272 (2020).
- 13 Guan, W. J. *et al.* Comorbidity and its impact on 1590 patients with COVID-19 in China: a nationwide analysis. *Eur Respir J* **55**, doi:10.1183/13993003.00547-2020 (2020).
- 14 Fu, L. *et al.* Clinical characteristics of coronavirus disease 2019 (COVID-19) in China: A systematic review and meta-analysis. *J Infect* **80**, 656-665, doi:10.1016/j.jinf.2020.03.041 (2020).
- 15 Cai, Q. *et al.* COVID-19 in a designated infectious diseases hospital outside Hubei Province, China. *Allergy* **75**, 1742-1752, doi:10.1111/all.14309 (2020).
- 16 Zhang, G. *et al.* Clinical features and short-term outcomes of 221 patients with COVID-19 in Wuhan, China. *J Clin Virol* **127**, 104364, doi:10.1016/j.jcv.2020.104364 (2020).

- 17 Zhang, R. *et al.* CT features of SARS-CoV-2 pneumonia according to clinical presentation: a retrospective analysis of 120 consecutive patients from Wuhan city. *Eur Radiol* **30**, 4417-4426, doi:10.1007/s00330-020-06854-1 (2020).
- 18 Nikpouraghdam, M. *et al.* Epidemiological characteristics of coronavirus disease 2019 (COVID-19) patients in IRAN: A single center study. *J Clin Virol* **127**, 104378, doi:10.1016/j.jcv.2020.104378 (2020).
- 19 Li, Y., Hu, Y., Yu, J. & Ma, T. Retrospective analysis of laboratory testing in 54 patients with severe- or critical-type 2019 novel coronavirus pneumonia. *Lab Invest* **100**, 794-800, doi:10.1038/s41374-020-0431-6 (2020).
- 20 Zhou, F. *et al.* Clinical course and risk factors for mortality of adult inpatients with COVID-19 in Wuhan, China: a retrospective cohort study. *Lancet* **395**, 1054-1062, doi:10.1016/S0140-6736(20)30566-3 (2020).
- 21 He, R. *et al.* The clinical course and its correlated immune status in COVID-19 pneumonia. *J Clin Virol* **127**, 104361, doi:10.1016/j.jcv.2020.104361 (2020).
- 22 Yang, A. P., Liu, J. P., Tao, W. Q. & Li, H. M. The diagnostic and predictive role of NLR, d-NLR and PLR in COVID-19 patients. *Int Immunopharmacol* **84**, 106504, doi:10.1016/j.intimp.2020.106504 (2020).
- 23 Borobia, A. M. *et al.* A Cohort of Patients with COVID-19 in a Major Teaching Hospital in Europe. *J Clin Med* **9**, doi:10.3390/jcm9061733 (2020).
- 24 Zhang, C. *et al.* A Novel Scoring System for Prediction of Disease Severity in COVID-19. *Front Cell Infect Microbiol* **10**, 318, doi:10.3389/fcimb.2020.00318 (2020).
- 25 Zhao, J., Gao, H. Y., Feng, Z. Y. & Wu, Q. J. A Retrospective Analysis of the Clinical and Epidemiological Characteristics of COVID-19 Patients in Henan Provincial People's Hospital, Zhengzhou, China. *Front Med (Lausanne)* **7**, 286, doi:10.3389/fmed.2020.00286 (2020).
- 26 Yao, Q. *et al.* A retrospective study of risk factors for severe acute respiratory syndrome coronavirus 2 infections in hospitalized adult patients. *Pol Arch Intern Med* **130**, 390-399, doi:10.20452/pamw.15312 (2020).
- 27 Kayem, G. *et al.* A snapshot of the Covid-19 pandemic among pregnant women in France. *J Gynecol Obstet Hum Reprod* **49**, 101826, doi:10.1016/j.jogoh.2020.101826 (2020).
- 28 Tambe, M. P. *et al.* An epidemiological study of laboratory confirmed COVID-19 cases admitted in a tertiary care hospital of Pune, Maharashtra. *Indian J Public Health* **64**, S183-S187, doi:10.4103/ijph.IJPH\_522\_20 (2020).
- 29 Yang, Q. *et al.* Analysis of the clinical characteristics, drug treatments and prognoses of 136 patients with coronavirus disease 2019. *J Clin Pharm Ther* **45**, 609-616, doi:10.1111/jcpt.13170 (2020).
- 30 Senkal, N. *et al.* Association between chronic ACE inhibitor exposure and decreased odds of severe disease in patients with COVID-19. *Anatol J Cardiol* **24**, 21-29, doi:10.14744/AnatolJCardiol.2020.57431 (2020).
- 31 Shi, S. *et al.* Association of Cardiac Injury With Mortality in Hospitalized Patients With COVID-19 in Wuhan, China. *JAMA Cardiol* **5**, 802-810, doi:10.1001/jamacardio.2020.0950 (2020).
- 32 Mani, V. R., Kalabin, A., Valdivieso, S. C., Murray-Ramcharan, M. & Donaldson, B. New York Inner City Hospital COVID-19 Experience and Current Data: Retrospective Analysis at the Epicenter of the American Coronavirus Outbreak. *J Med Internet Res* **22**, e20548, doi:10.2196/20548 (2020).

- 33 Li, M. *et al.* Cardiovascular disease potentially contributes to the progression and poor prognosis of COVID-19. *Nutr Metab Cardiovasc Dis* **30**, 1061-1067, doi:10.1016/j.numecd.2020.04.013 (2020).
- 34 Salacup, G. *et al.* Characteristics and clinical outcomes of COVID-19 patients in an underserved-inner city population: A single tertiary center cohort. *J Med Virol*, doi:10.1002/jmv.26252 (2020).
- 35 Shi, S. *et al.* Characteristics and clinical significance of myocardial injury in patients with severe coronavirus disease 2019. *Eur Heart J* **41**, 2070-2079, doi:10.1093/eurheartj/ehaa408 (2020).
- 36 Kalyanaraman Marcello, R. *et al.* Characteristics and Outcomes of COVID-19 Patients in New York City's Public Hospital System. *medRxiv*, doi:10.1101/2020.05.29.20086645 (2020).
- 37 Israelsen, S. B. *et al.* Characteristics of patients with COVID-19 pneumonia at Hvidovre Hospital, March-April 2020. *Dan Med J* **67** (2020).
- 38 Pellaud, C. *et al.* Characteristics, comorbidities, 30-day outcome and in-hospital mortality of patients hospitalised with COVID-19 in a Swiss area - a retrospective cohort study. *Swiss Med Wkly* **150**, w20314, doi:10.4414/smw.2020.20314 (2020).
- 39 Gregoriano, C. *et al.* Characteristics, predictors and outcomes among 99 patients hospitalised with COVID-19 in a tertiary care centre in Switzerland: an observational analysis. *Swiss Med Wkly* **150**, w20316, doi:10.4414/smw.2020.20316 (2020).
- 40 Argenziano, M. G. *et al.* Characterization and clinical course of 1000 Patients with COVID-19 in New York: retrospective case series. *medRxiv*, doi:10.1101/2020.04.20.20072116 (2020).
- 41 Borghesi, A. *et al.* Chest X-ray severity index as a predictor of in-hospital mortality in coronavirus disease 2019: A study of 302 patients from Italy. *Int J Infect Dis* **96**, 291-293, doi:10.1016/j.ijid.2020.05.021 (2020).
- 42 Toussie, D. *et al.* Clinical and Chest Radiography Features Determine Patient Outcomes in Young and Middle-aged Adults with COVID-19. *Radiology* **297**, E197-E206, doi:10.1148/radiol.2020201754 (2020).
- 43 Ortiz-Brizuela, E. *et al.* Clinical and Epidemiological Characteristics of Patients Diagnosed with Covid-19 in a Tertiary Care Center in Mexico City: A Prospective Cohort Study. *Rev Invest Clin* **72**, 165-177, doi:10.24875/RIC.20000211 (2020).
- 44 Aggarwal, A., Shrivastava, A., Kumar, A. & Ali, A. Clinical and Epidemiological Features of SARS-CoV-2 Patients in SARI Ward of a Tertiary Care Centre in New Delhi. *J Assoc Physicians India* **68**, 19-26 (2020).
- 45 Javanian, M. *et al.* Clinical and laboratory findings from patients with COVID-19 pneumonia in Babol North of Iran: a retrospective cohort study. *Rom J Intern Med* **58**, 161-167, doi:10.2478/rjim-2020-0013 (2020).
- 46 Huang, Q. *et al.* Clinical characteristics and drug therapies in patients with the common-type coronavirus disease 2019 in Hunan, China. *Int J Clin Pharm* **42**, 837-845, doi:10.1007/s11096-020-01031-2 (2020).
- 47 Pelayo, J. *et al.* Clinical Characteristics and Outcomes of Community- and Hospital-Acquired Acute Kidney Injury with COVID-19 in a US Inner City Hospital System. *Cardiorenal Med* **10**, 223-231, doi:10.1159/000509182 (2020).
- 48 Alkundi, A., Mahmoud, I., Musa, A., Naveed, S. & Alshawwaf, M. Clinical characteristics and outcomes of COVID-19 hospitalized patients with diabetes in the United Kingdom: A retrospective single centre study. *Diabetes Res Clin Pract* **165**, 108263, doi:10.1016/j.diabres.2020.108263 (2020).
- 49 Qin, C. *et al.* Clinical Characteristics and Outcomes of COVID-19 Patients With a History of Stroke in Wuhan, China. *Stroke* **51**, 2219-2223, doi:10.1161/STROKEAHA.120.030365 (2020).



- 50 Chen, Y. *et al.* Clinical Characteristics and Outcomes of Patients With Diabetes and COVID-19 in Association With Glucose-Lowering Medication. *Diabetes Care* **43**, 1399-1407, doi:10.2337/dc20-0660 (2020).
- 51 Khamis, F. *et al.* Clinical characteristics and outcomes of the first 63 adult patients hospitalized with COVID-19: An experience from Oman. *J Infect Public Health* **13**, 906-913, doi:10.1016/j.jiph.2020.06.002 (2020).
- 52 Gayam, V. *et al.* Clinical characteristics and predictors of mortality in African-Americans with COVID-19 from an inner-city community teaching hospital in New York. *J Med Virol*, doi:10.1002/jmv.26306 (2020).
- 53 Shi, Q. *et al.* Clinical Characteristics and Risk Factors for Mortality of COVID-19 Patients With Diabetes in Wuhan, China: A Two-Center, Retrospective Study. *Diabetes Care* **43**, 1382-1391, doi:10.2337/dc20-0598 (2020).
- 54 Nowak, B. *et al.* Clinical characteristics and short-term outcomes of patients with coronavirus disease 2019: a retrospective single-center experience of a designated hospital in Poland. *Pol Arch Intern Med* **130**, 407-411, doi:10.20452/pamw.15361 (2020).
- 55 Rottoli, M. *et al.* How important is obesity as a risk factor for respiratory failure, intensive care admission and death in hospitalised COVID-19 patients? Results from a single Italian centre. *Eur J Endocrinol* **183**, 389-397, doi:10.1530/EJE-20-0541 (2020).
- 56 Huang, Y. *et al.* Clinical characteristics of 17 patients with COVID-19 and systemic autoimmune diseases: a retrospective study. *Ann Rheum Dis* **79**, 1163-1169, doi:10.1136/annrheumdis-2020-217425 (2020).
- 57 Li, T. *et al.* Clinical characteristics of 312 hospitalized older patients with COVID-19 in Wuhan, China. *Arch Gerontol Geriatr* **91**, 104185, doi:10.1016/j.archger.2020.104185 (2020).
- 58 Zhou, X., Zhu, J. & Xu, T. Clinical characteristics of coronavirus disease 2019 (COVID-19) patients with hypertension on renin-angiotensin system inhibitors. *Clin Exp Hypertens* **42**, 656-660, doi:10.1080/10641963.2020.1764018 (2020).
- 59 Wu, F. *et al.* Clinical characteristics of COVID-19 infection in chronic obstructive pulmonary disease: a multicenter, retrospective, observational study. *J Thorac Dis* **12**, 1811-1823, doi:10.21037/jtd-20-1914 (2020).
- 60 Xu, J. *et al.* Clinical course and predictors of 60-day mortality in 239 critically ill patients with COVID-19: a multicenter retrospective study from Wuhan, China. *Crit Care* **24**, 394, doi:10.1186/s13054-020-03098-9 (2020).
- 61 Buckner, F. S. *et al.* Clinical Features and Outcomes of 105 Hospitalized patients with COVID-19 in Seattle, Washington. *Clin Infect Dis*, doi:10.1093/cid/ciaa632 (2020).
- 62 Wan, S. *et al.* Clinical features and treatment of COVID-19 patients in northeast Chongqing. *J Med Virol* **92**, 797-806, doi:10.1002/jmv.25783 (2020).
- 63 Li, J. *et al.* Clinical features of familial clustering in patients infected with 2019 novel coronavirus in Wuhan, China. *Virus Res* **286**, 198043, doi:10.1016/j.virusres.2020.198043 (2020).
- 64 Cao, M. *et al.* Clinical Features of Patients Infected with the 2019 Novel Coronavirus (COVID-19) in Shanghai, China. *medRxiv*, doi:10.1101/2020.03.04.20030395 (2020).
- 65 Sun, L. *et al.* Clinical features of patients with coronavirus disease 2019 from a designated hospital in Beijing, China. *J Med Virol*, doi:10.1002/jmv.25966 (2020).
- 66 Huang, R. *et al.* Clinical findings of patients with coronavirus disease 2019 in Jiangsu province, China: A retrospective, multi-center study. *PLoS Negl Trop Dis* **14**, e0008280, doi:10.1371/journal.pntd.0008280 (2020).

- 67 Labenz, C. *et al.* Clinical Frailty Scale for risk stratification in patients with SARS-CoV-2 infection. *J Investig Med* **68**, 1199-1202, doi:10.1136/jim-2020-001410 (2020).
- 68 Zhang, J. J. *et al.* Clinical, radiological, and laboratory characteristics and risk factors for severity and mortality of 289 hospitalized COVID-19 patients. *Allergy*, doi:10.1111/all.14496 (2020).
- 69 Martos Perez, F. *et al.* Comorbidity and prognostic factors on admission in a COVID-19 cohort of a general hospital. *Rev Clin Esp*, doi:10.1016/j.rce.2020.05.017 (2020).
- 70 Wang, L. *et al.* Coronavirus Disease 19 Infection Does Not Result in Acute Kidney Injury: An Analysis of 116 Hospitalized Patients from Wuhan, China. *Am J Nephrol* **51**, 343-348, doi:10.1159/000507471 (2020).
- 71 Cai, Q. *et al.* Obesity and COVID-19 Severity in a Designated Hospital in Shenzhen, China. *Diabetes Care* **43**, 1392-1398, doi:10.2337/dc20-0576 (2020).
- 72 Guner, R. *et al.* COVID-19 experience of the major pandemic response center in the capital: Results of the pandemic's first month in Turkey. *Turk J Med Sci*, doi:10.3906/sag-2006-164 (2020).
- 73 Zhou, Y. *et al.* COVID-19 Is Distinct From SARS-CoV-2-Negative Community-Acquired Pneumonia. *Front Cell Infect Microbiol* **10**, 322, doi:10.3389/fcimb.2020.00322 (2020).
- 74 Feng, Y. *et al.* COVID-19 with Different Severities: A Multicenter Study of Clinical Features. *Am J Respir Crit Care Med* **201**, 1380-1388, doi:10.1164/rccm.202002-0445OC (2020).
- 75 Brill, S. E. *et al.* COVID-19: a retrospective cohort study with focus on the over-80s and hospital-onset disease. *BMC Med* **18**, 194, doi:10.1186/s12916-020-01665-z (2020).
- 76 Shah, P. *et al.* Demographics, comorbidities and outcomes in hospitalized Covid-19 patients in rural southwest Georgia. *Ann Med* **52**, 354-360, doi:10.1080/07853890.2020.1791356 (2020).
- 77 Lagi, F. *et al.* Early experience of an infectious and tropical diseases unit during the coronavirus disease (COVID-19) pandemic, Florence, Italy, February to March 2020. *Euro Surveill* **25**, doi:10.2807/1560-7917.ES.2020.25.17.2000556 (2020).
- 78 Yang, Q. *et al.* Effect of hypertension on outcomes of adult inpatients with COVID-19 in Wuhan, China: a propensity score-matching analysis. *Respir Res* **21**, 172, doi:10.1186/s12931-020-01435-8 (2020).
- 79 Ji, W. *et al.* Effect of Underlying Comorbidities on the Infection and Severity of COVID-19 in Korea: a Nationwide Case-Control Study. *J Korean Med Sci* **35**, e237, doi:10.3346/jkms.2020.35.e237 (2020).
- 80 Lee, J. Y. *et al.* Epidemiological and clinical characteristics of coronavirus disease 2019 in Daegu, South Korea. *Int J Infect Dis* **98**, 462-466, doi:10.1016/j.ijid.2020.07.017 (2020).
- 81 Shahriarirad, R. *et al.* Epidemiological and clinical features of 2019 novel coronavirus diseases (COVID-19) in the South of Iran. *BMC Infect Dis* **20**, 427, doi:10.1186/s12879-020-05128-x (2020).
- 82 Baqui, P., Bica, I., Marra, V., Ercole, A. & van der Schaar, M. Ethnic and regional variations in hospital mortality from COVID-19 in Brazil: a cross-sectional observational study. *Lancet Glob Health* **8**, e1018-e1026, doi:10.1016/S2214-109X(20)30285-0 (2020).
- 83 Asfahan, S. *et al.* Extrapolation of mortality in COVID-19: Exploring the role of age, sex, co-morbidities and health-care related occupation. *Monaldi Arch Chest Dis* **90**, doi:10.4081/monaldi.2020.1325 (2020).

- 84 Petrilli, C. M. *et al.* Factors associated with hospital admission and critical illness among 5279 people with coronavirus disease 2019 in New York City: prospective cohort study. *BMJ* **369**, m1966, doi:10.1136/bmj.m1966 (2020).
- 85 Mendy, A., Apewokin, S., Wells, A. A. & Morrow, A. L. Factors Associated with Hospitalization and Disease Severity in a Racially and Ethnically Diverse Population of COVID-19 Patients. *medRxiv*, doi:10.1101/2020.06.25.20137323 (2020).
- 86 Masetti, C. *et al.* High mortality in COVID-19 patients with mild respiratory disease. *Eur J Clin Invest* **50**, e13314, doi:10.1111/eci.13314 (2020).
- 87 Davies, M. A. HIV and risk of COVID-19 death: a population cohort study from the Western Cape Province, South Africa. *medRxiv*, doi:10.1101/2020.07.02.20145185 (2020).
- 88 Huang, J. *et al.* Hypoalbuminemia predicts the outcome of COVID-19 independent of age and co-morbidity. *J Med Virol*, doi:10.1002/jmv.26003 (2020).
- 89 Kammar-Garcia, A. *et al.* Impact of Comorbidities in Mexican Sars-Cov-2-Positive Patients: A Retrospective Analysis in a National Cohort. *Rev Invest Clin* **72**, 151-158, doi:10.24875/RIC.20000207 (2020).
- 90 Ye, C. *et al.* Impact of comorbidities on patients with COVID-19: A large retrospective study in Zhejiang, China. *J Med Virol*, doi:10.1002/jmv.26183 (2020).
- 91 Bonetti, G. *et al.* Laboratory predictors of death from coronavirus disease 2019 (COVID-19) in the area of Valcamonica, Italy. *Clin Chem Lab Med* **58**, 1100-1105, doi:10.1515/cclm-2020-0459 (2020).
- 92 Ponziani, F. R. *et al.* Liver involvement is not associated with mortality: results from a large cohort of SARS-CoV-2 positive patients. *Aliment Pharmacol Ther*, doi:10.1111/apt.15996 (2020).
- 93 Klang, E. *et al.* Severe Obesity as an Independent Risk Factor for COVID-19 Mortality in Hospitalized Patients Younger than 50. *Obesity (Silver Spring)* **28**, 1595-1599, doi:10.1002/oby.22913 (2020).
- 94 Sousa, G. J. B. *et al.* Mortality and survival of COVID-19. *Epidemiol Infect* **148**, e123, doi:10.1017/S0950268820001405 (2020).
- 95 Brouns, S. H. *et al.* Mortality and the Use of Antithrombotic Therapies Among Nursing Home Residents with COVID-19. *J Am Geriatr Soc* **68**, 1647-1652, doi:10.1111/jgs.16664 (2020).
- 96 Lorente-Ros, A. *et al.* Myocardial injury determination improves risk stratification and predicts mortality in COVID-19 patients. *Cardiol J*, doi:10.5603/CJ.a2020.0089 (2020).
- 97 Tatum, D. *et al.* Neutrophil-to-Lymphocyte Ratio and Outcomes in Louisiana Covid-19 Patients. *Shock*, doi:10.1097/SHK.0000000000001585 (2020).
- 98 Sabri, A. *et al.* Novel coronavirus disease 2019: predicting prognosis with a computed tomography-based disease severity score and clinical laboratory data. *Pol Arch Intern Med* **130**, 629-634, doi:10.20452/pamw.15422 (2020).
- 99 Driggin, E. *et al.* Cardiovascular Considerations for Patients, Health Care Workers, and Health Systems During the COVID-19 Pandemic. *J Am Coll Cardiol* **75**, 2352-2371, doi:10.1016/j.jacc.2020.03.031 (2020).
- 100 Pettit, N. N. *et al.* Obesity is Associated with Increased Risk for Mortality Among Hospitalized Patients with COVID-19. *Obesity (Silver Spring)* **28**, 1806-1810, doi:10.1002/oby.22941 (2020).

- 101 Ji, D. *et al.* Prediction for Progression Risk in Patients With COVID-19 Pneumonia: The CALL Score. *Clin Infect Dis* **71**, 1393-1399, doi:10.1093/cid/ciaa414 (2020).
- 102 Gidari, A., De Socio, G. V., Sabbatini, S. & Francisci, D. Predictive value of National Early Warning Score 2 (NEWS2) for intensive care unit admission in patients with SARS-CoV-2 infection. *Infect Dis (Lond)* **52**, 698-704, doi:10.1080/23744235.2020.1784457 (2020).
- 103 Du, R. H. *et al.* Predictors of mortality for patients with COVID-19 pneumonia caused by SARS-CoV-2: a prospective cohort study. *Eur Respir J* **55**, doi:10.1183/13993003.00524-2020 (2020).
- 104 Sarin, S. K. *et al.* Pre-existing liver disease is associated with poor outcome in patients with SARS CoV2 infection; The APCOLIS Study (APASL COVID-19 Liver Injury Spectrum Study). *Hepatol Int*, doi:10.1007/s12072-020-10072-8 (2020).
- 105 Ebinger, J. E. *et al.* Pre-existing traits associated with Covid-19 illness severity. *PLoS One* **15**, e0236240, doi:10.1371/journal.pone.0236240 (2020).
- 106 Pagnesi, M. *et al.* Pulmonary hypertension and right ventricular involvement in hospitalised patients with COVID-19. *Heart* **106**, 1324-1331, doi:10.1136/heartjnl-2020-317355 (2020).
- 107 Rastad, H. *et al.* Risk and predictors of in-hospital mortality from COVID-19 in patients with diabetes and cardiovascular disease. *Diabetol Metab Syndr* **12**, 57, doi:10.1186/s13098-020-00565-9 (2020).
- 108 van Gerwen, M. *et al.* Risk factors and outcomes of COVID-19 in New York City; a retrospective cohort study. *J Med Virol*, doi:10.1002/jmv.26337 (2020).
- 109 Zhou, Y., Zhang, Z., Tian, J. & Xiong, S. Risk factors associated with disease progression in a cohort of patients infected with the 2019 novel coronavirus. *Ann Palliat Med* **9**, 428-436, doi:10.21037/apm.2020.03.26 (2020).
- 110 Grasselli, G. *et al.* Risk Factors Associated With Mortality Among Patients With COVID-19 in Intensive Care Units in Lombardy, Italy. *JAMA Intern Med*, doi:10.1001/jamainternmed.2020.3539 (2020).
- 111 Xu, P. P. *et al.* Risk factors for adverse clinical outcomes with COVID-19 in China: a multicenter, retrospective, observational study. *Theranostics* **10**, 6372-6383, doi:10.7150/thno.46833 (2020).
- 112 Cen, Y. *et al.* Risk factors for disease progression in patients with mild to moderate coronavirus disease 2019-a multi-centre observational study. *Clin Microbiol Infect*, doi:10.1016/j.cmi.2020.05.041 (2020).
- 113 Soares, R. C. M., Mattos, L. R. & Raposo, L. M. Risk Factors for Hospitalization and Mortality due to COVID-19 in Espirito Santo State, Brazil. *Am J Trop Med Hyg* **103**, 1184-1190, doi:10.4269/ajtmh.20-0483 (2020).
- 114 Li, X. *et al.* Risk factors for severity and mortality in adult COVID-19 inpatients in Wuhan. *J Allergy Clin Immunol* **146**, 110-118, doi:10.1016/j.jaci.2020.04.006 (2020).
- 115 Gao, S. *et al.* Risk factors influencing the prognosis of elderly patients infected with COVID-19: a clinical retrospective study in Wuhan, China. *Aging (Albany NY)* **12**, 12504-12516, doi:10.18632/aging.103631 (2020).
- 116 Urra, J. M., Cabrera, C. M., Porrás, L. & Rodenas, I. Selective CD8 cell reduction by SARS-CoV-2 is associated with a worse prognosis and systemic inflammation in COVID-19 patients. *Clin Immunol* **217**, 108486, doi:10.1016/j.clim.2020.108486 (2020).
- 117 Rivera-Izquierdo, M. *et al.* Sociodemographic, clinical and laboratory factors on admission associated with COVID-19 mortality in hospitalized patients: A retrospective observational study. *PLoS One* **15**, e0235107, doi:10.1371/journal.pone.0235107 (2020).

- 118 Deng, Q. *et al.* Suspected myocardial injury in patients with COVID-19: Evidence from front-line clinical observation in Wuhan, China. *Int J Cardiol* **311**, 116-121, doi:10.1016/j.ijcard.2020.03.087 (2020).
- 119 Kim, D. W., Byeon, K. H., Kim, J., Cho, K. D. & Lee, N. The Correlation of Comorbidities on the Mortality in Patients with COVID-19: an Observational Study Based on the Korean National Health Insurance Big Data. *J Korean Med Sci* **35**, e243, doi:10.3346/jkms.2020.35.e243 (2020).
- 120 Hewitt, J. *et al.* The effect of frailty on survival in patients with COVID-19 (COPE): a multicentre, European, observational cohort study. *Lancet Public Health* **5**, e444-e451, doi:10.1016/S2468-2667(20)30146-8 (2020).
